# Supplementary material for: Skin Care Product Rich in Antioxidants and Anti-Inflammatory Natural Compounds Reduces Itching and Inflammation in the Skin of Atopic Dermatitis Patients
Source: MDPI journal article supplement (doi:10.3390/antiox11061071), 2022-05-28
Supplement: s1 [file s1]

## Supplementary Material

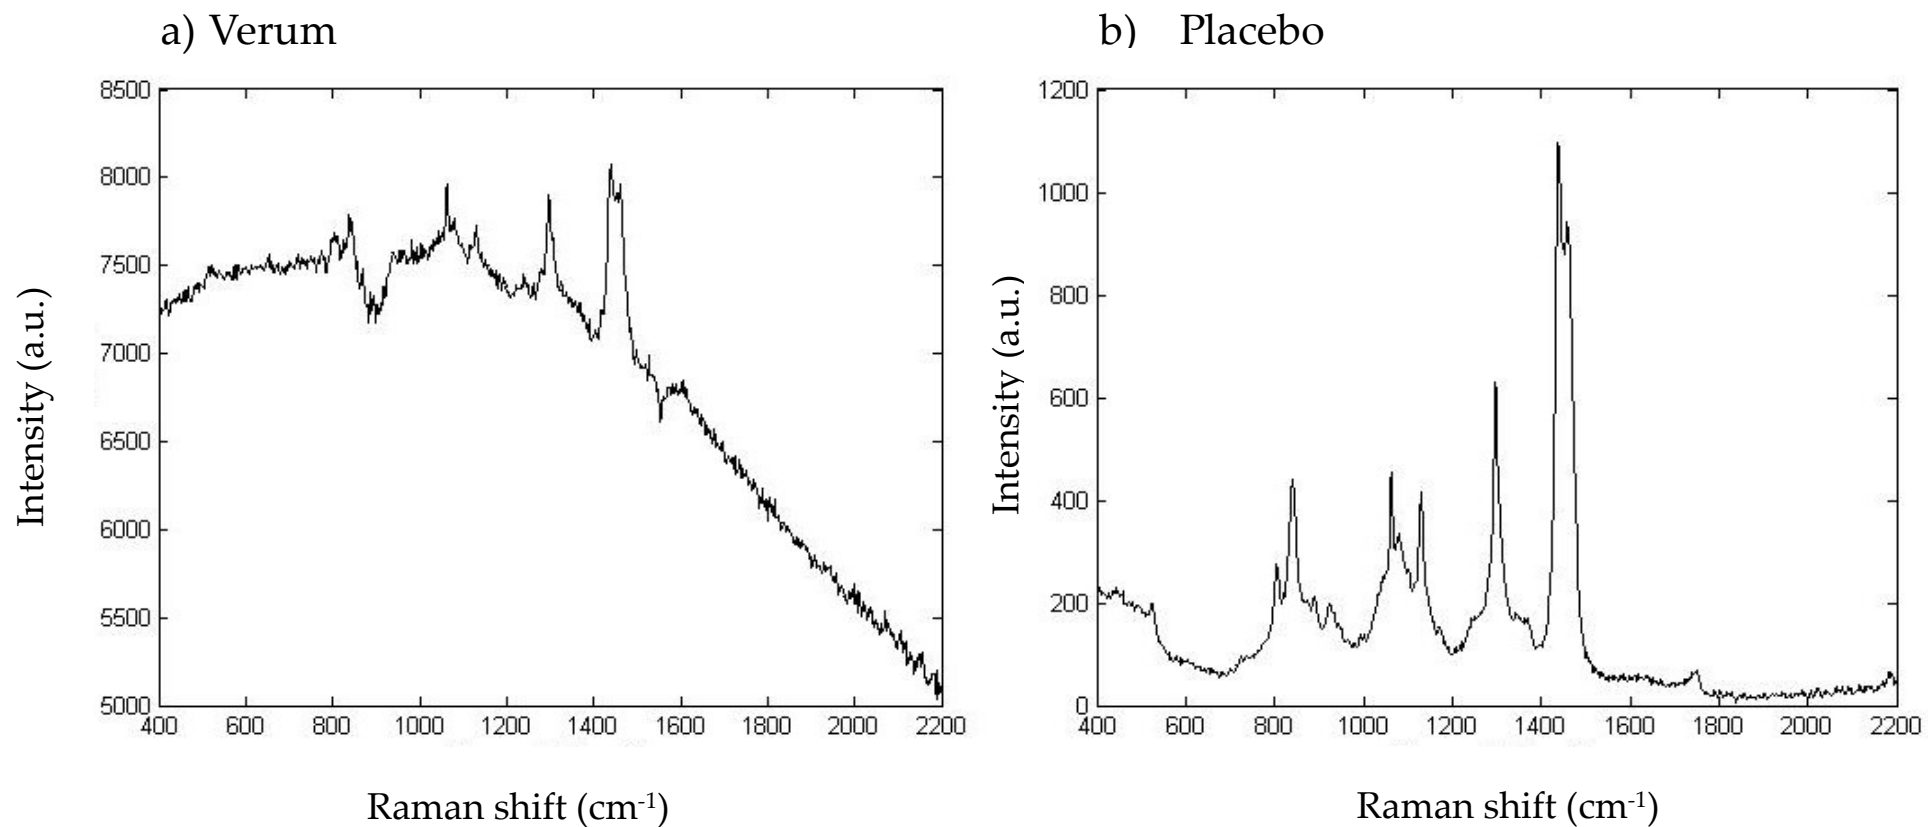

**Figure S1. Representative averaged Raman spectra of verum a) and placebo b) creams**

Untreated skin

Placebo cream-treated skin

Verum cream-treated skin

2  $\mu\text{m}$

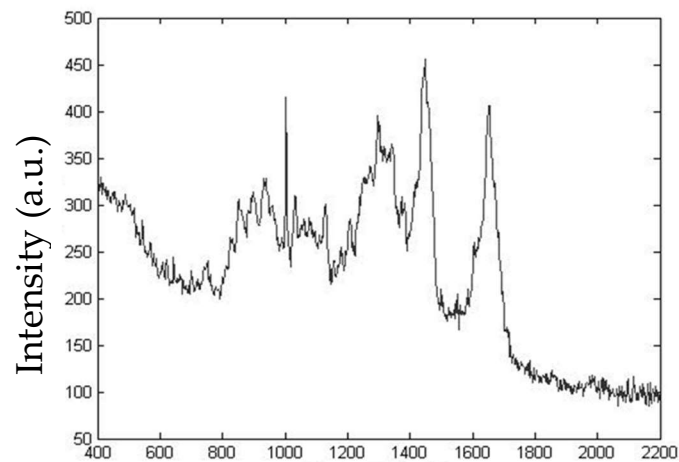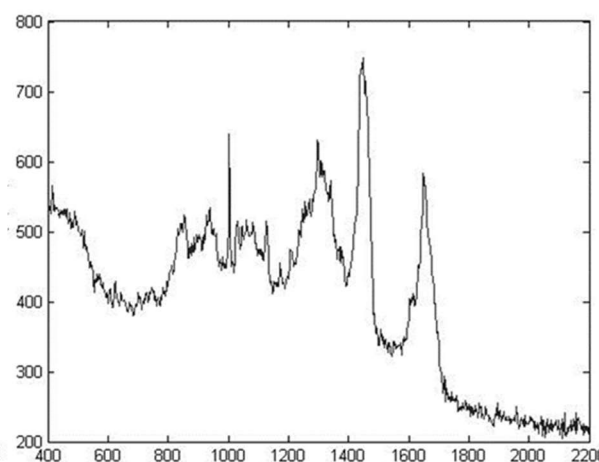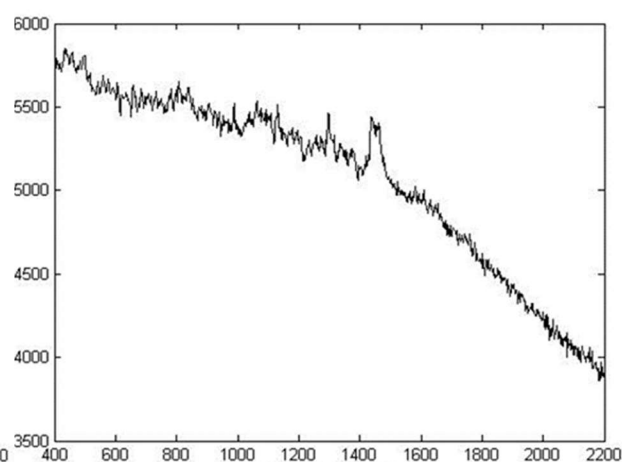

8  $\mu\text{m}$

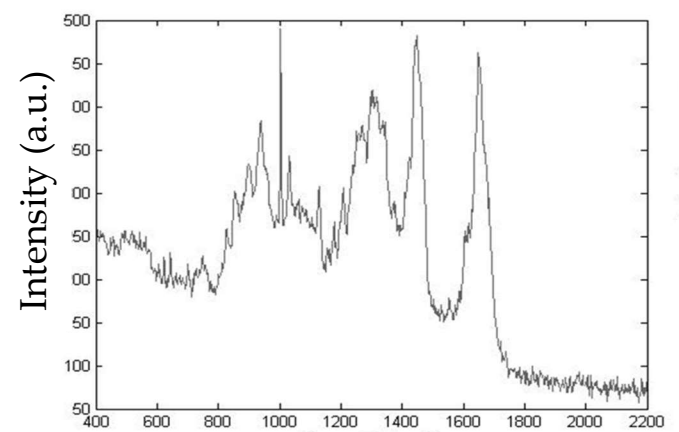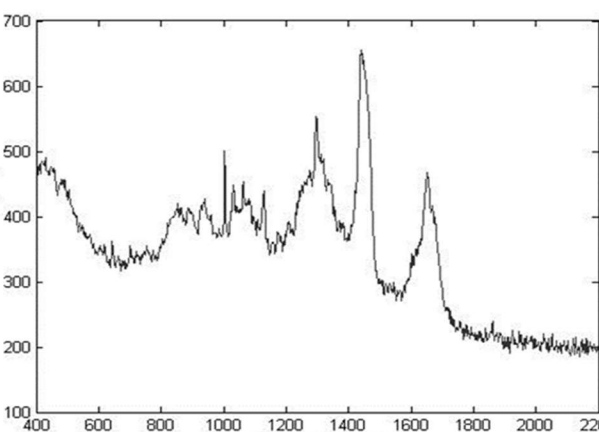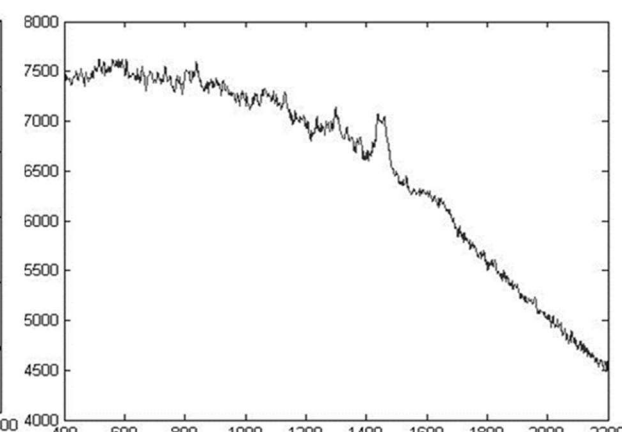

Raman shift ( $\text{cm}^{-1}$ )

Raman shift ( $\text{cm}^{-1}$ )

Raman shift ( $\text{cm}^{-1}$ )

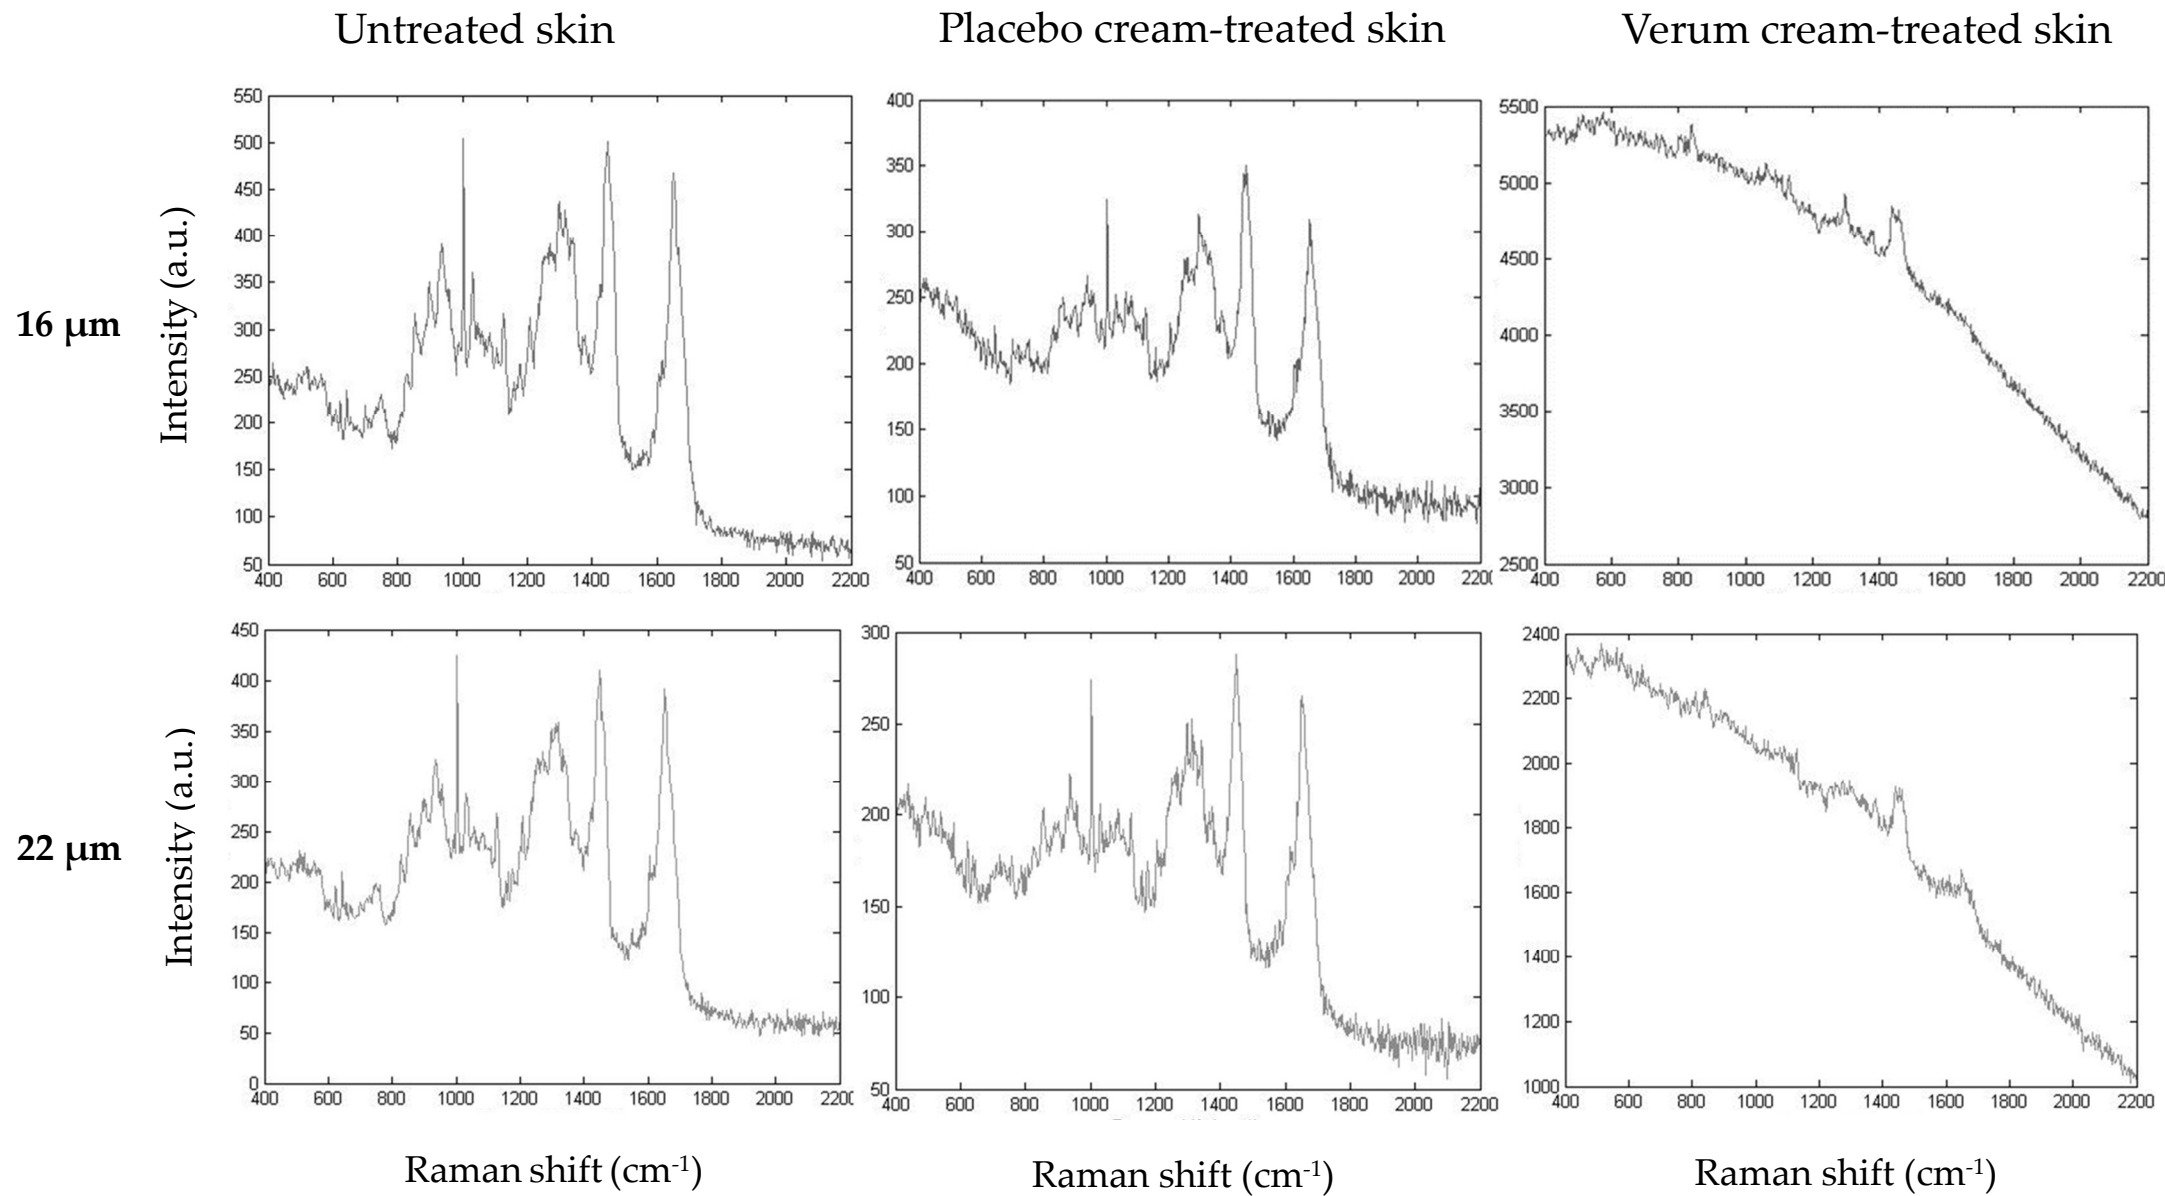

Figure S2. Representative averaged Raman spectra of untreated skin (left column), placebo cream-treated skin (middle column) and verum cream-treated skin (right column) recorded at different exemplary skin depths (2, 8, 16 and 22  $\mu\text{m}$ ).

Stratum corneum thickness is 18  $\mu\text{m}$  after 2 hours penetration time.
